# Supplementary figures and images for: Antioxidative polyphenols attenuate pyocyanin-induced ROS production in neuronal HT22 cell lines
Source: Royal Society of Chemistry journal article supplement (doi:10.1039/d3ra02943c), 2023-01-01

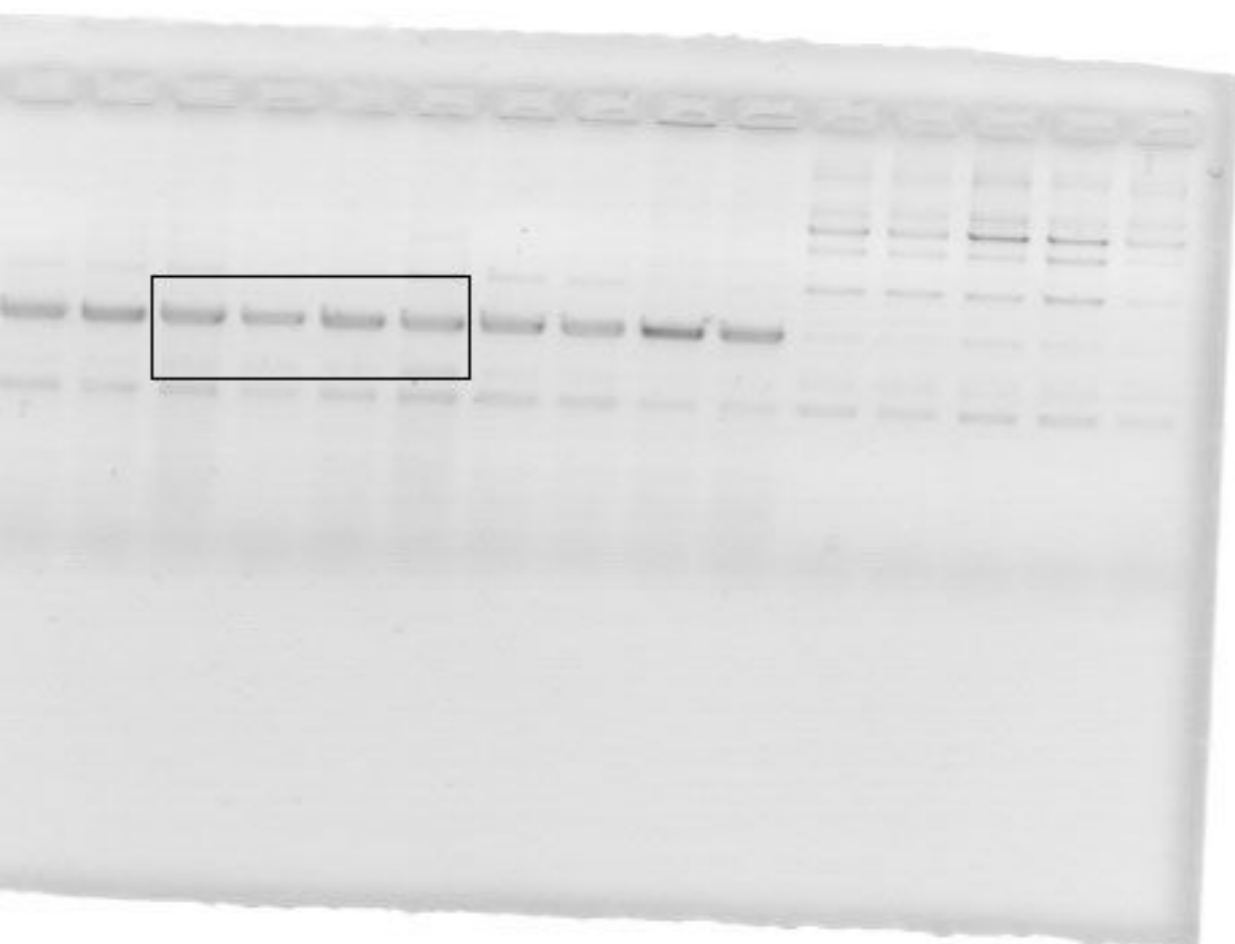

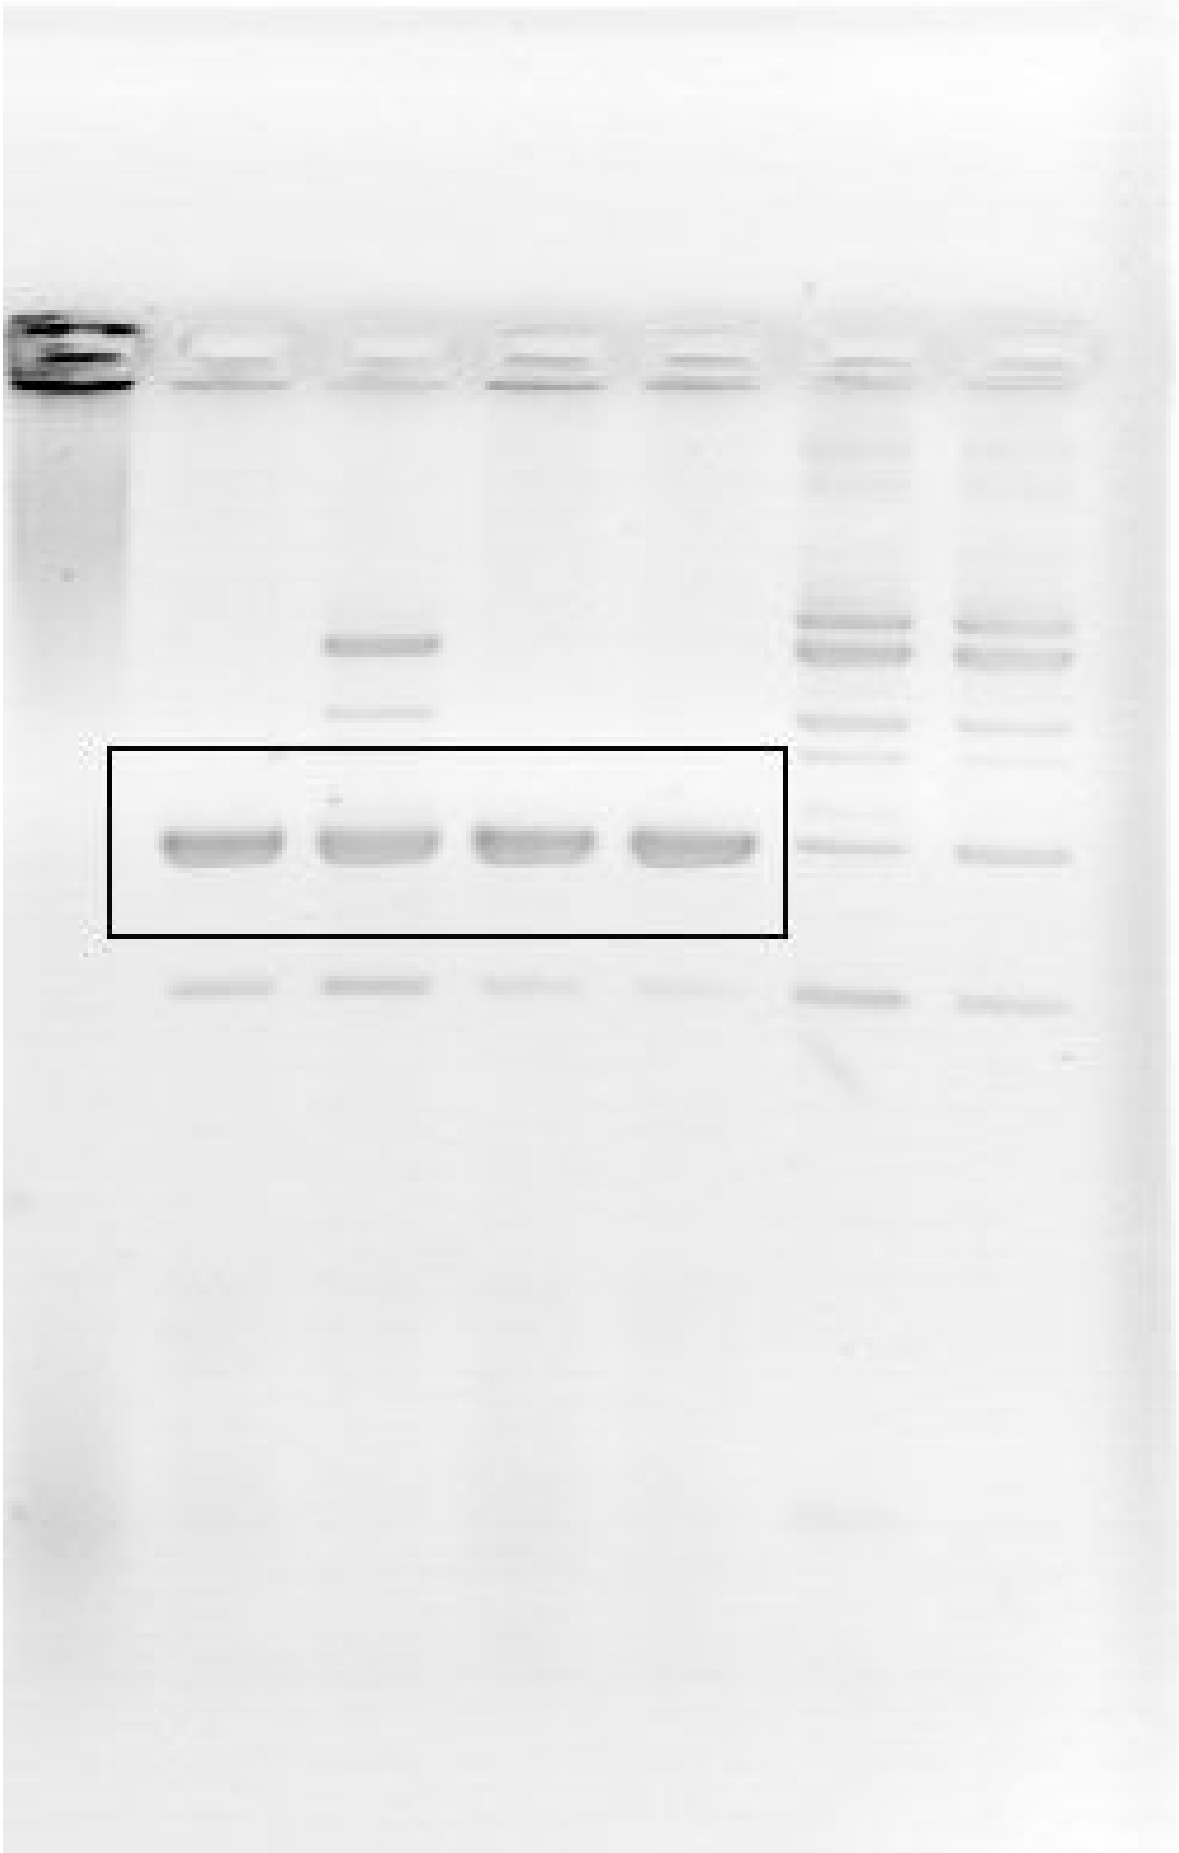

FILM 0 . . . KODAK FILM 0 . . . KODAK FILM

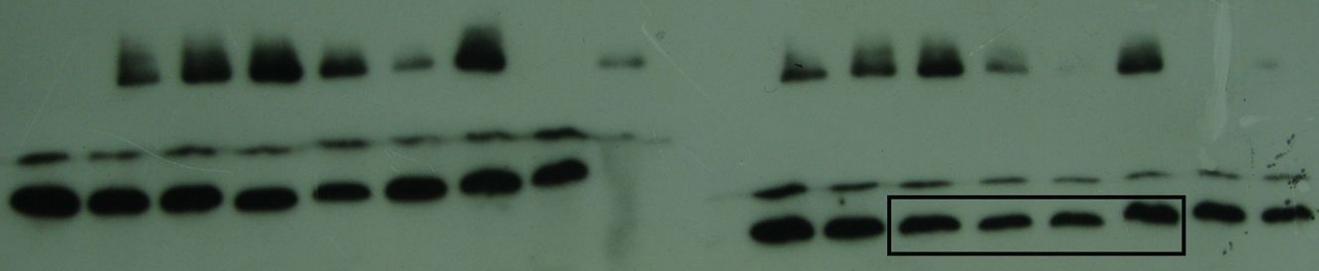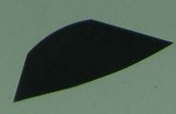

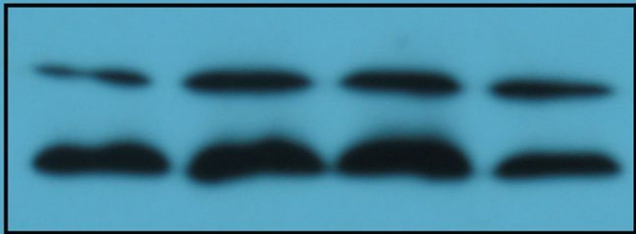

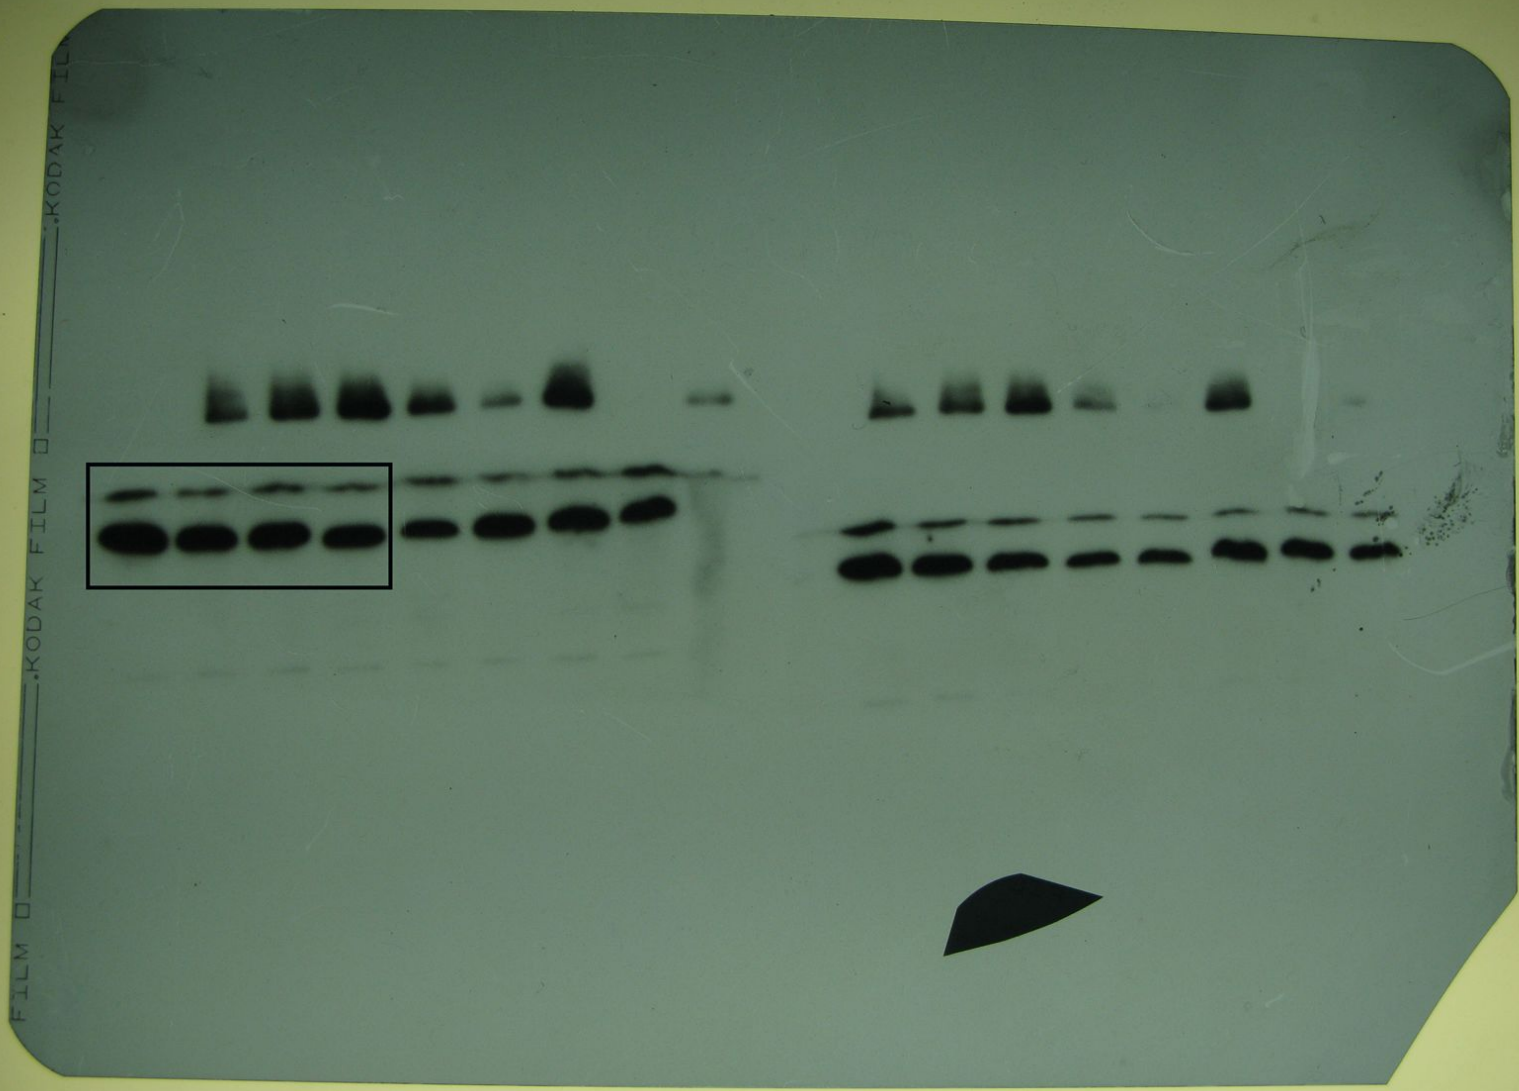

1911

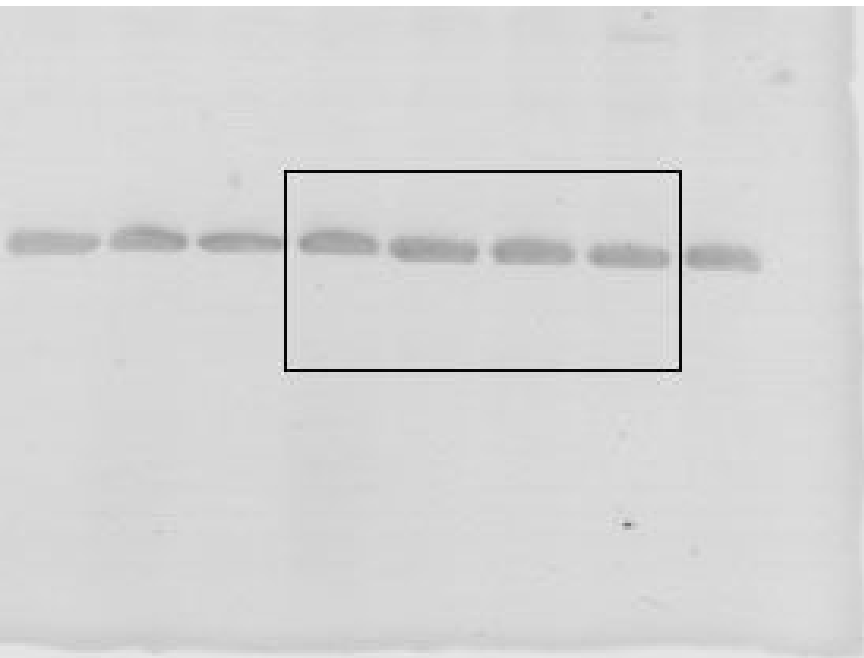

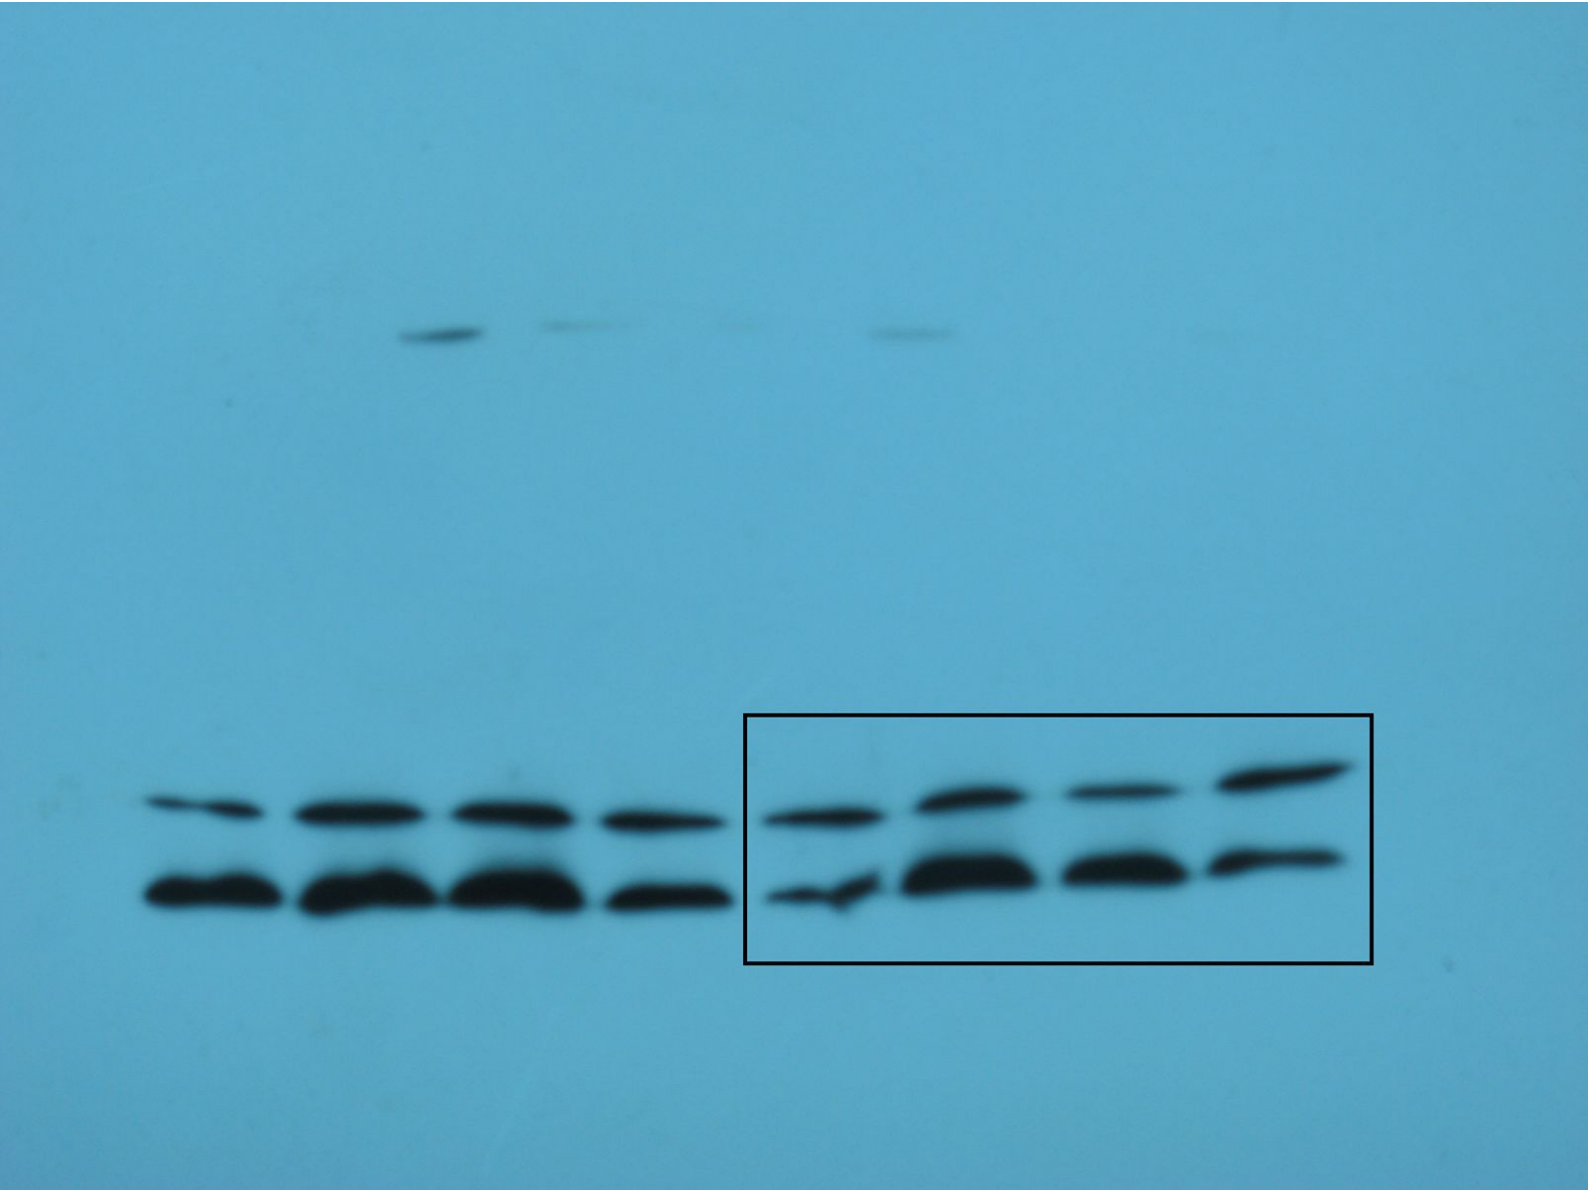

Supplement: d3ra02943c1.pdf [file d3ra02943c1.pdf]
